# Supplementary material for: Covalent 18F-Radiotracers for SNAPTag: a New Toolbox for Reporter Gene Imaging
Source: Preprints.org preprint supplement (doi:10.20944/preprints202108.0260.v1), 2021-08-11
Supplement: Supplementary file 1 [file supplementary]

Archive with 1 entries (1 files):
- SNAP_supplements_100821.pdf
